# Supplementary material for: Chemical conjugation of aptamer–sphingomyelin nanosystems and their potential as inhibitors of tumour cell proliferation in breast cancer cells
Source: Royal Society of Chemistry journal article supplement (doi:10.1039/d3nr03022a), 2023-01-01
Supplement: d3nr03022a3.pdf [file d3nr03022a3.pdf]

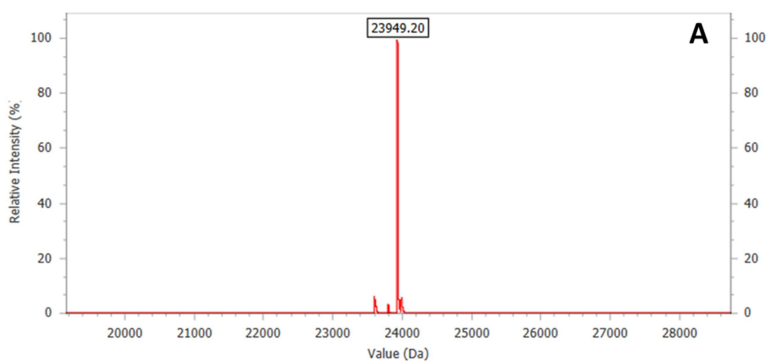

**Sequence Name:** MNK2F Azide  
**Sequence:** 5'- /5AzideN/GCG GAT GAA GAC TGG TGT GGG GTG GGC GGG CGG GGG TGG GGG TGG TAT GGC GCG TTG GCC CTA AAT ACG AGC AAC -3'  
**Calculated Molecular Weight:** 23949.5  
**Measured Molecular Weight:** 23949.20

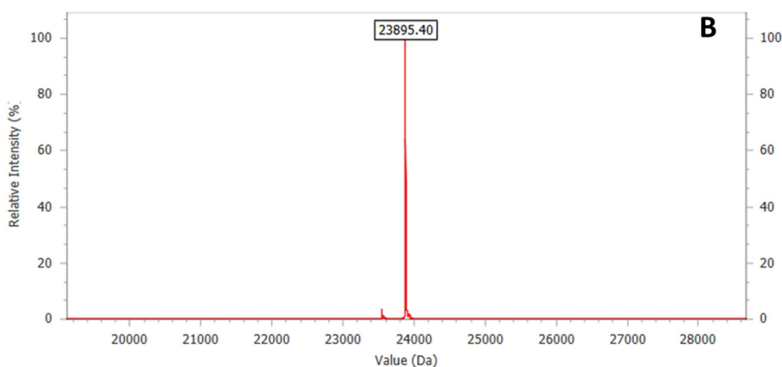

**Sequence Name:** MNK2F Amino  
**Sequence:** 5'- /5AmMC12/GCG GAT GAA GAC TGG TGT GGG GTG GGC GGG CGG GGG TGG GGG TGG TAT GGC GCG TTG GCC CTA AAT ACG AGC AAC -3'  
**Calculated Molecular Weight:** 23894.5  
**Measured Molecular Weight:** 23895.40

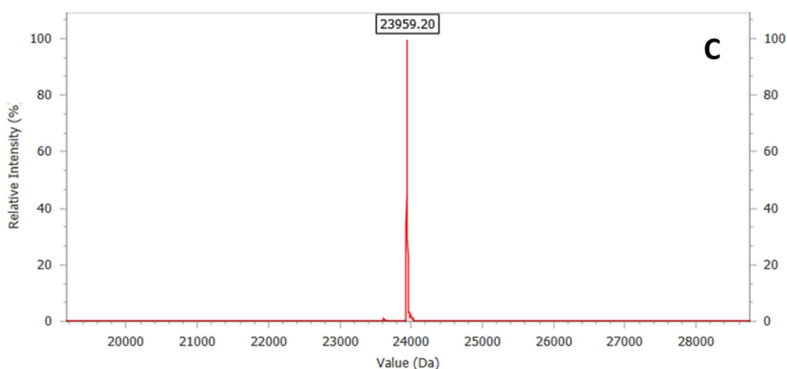

**Sequence Name:** MNK2F Thiol  
**Sequence:** 5'- /5ThioMC6-D/GCG GAT GAA GAC TGG TGT GGG GTG GGC GGG CGG GGG TGG GGG TGG TAT GGC GCG TTG GCC CTA AAT ACG AGC AAC -3'  
**Calculated Molecular Weight:** 23959.6  
**Measured Molecular Weight:** 23959.20
