# Supplementary figures and images for: Chemical conjugation of aptamer–sphingomyelin nanosystems and their potential as inhibitors of tumour cell proliferation in breast cancer cells
Source: Royal Society of Chemistry journal article supplement (doi:10.1039/d3nr03022a), 2023-01-01

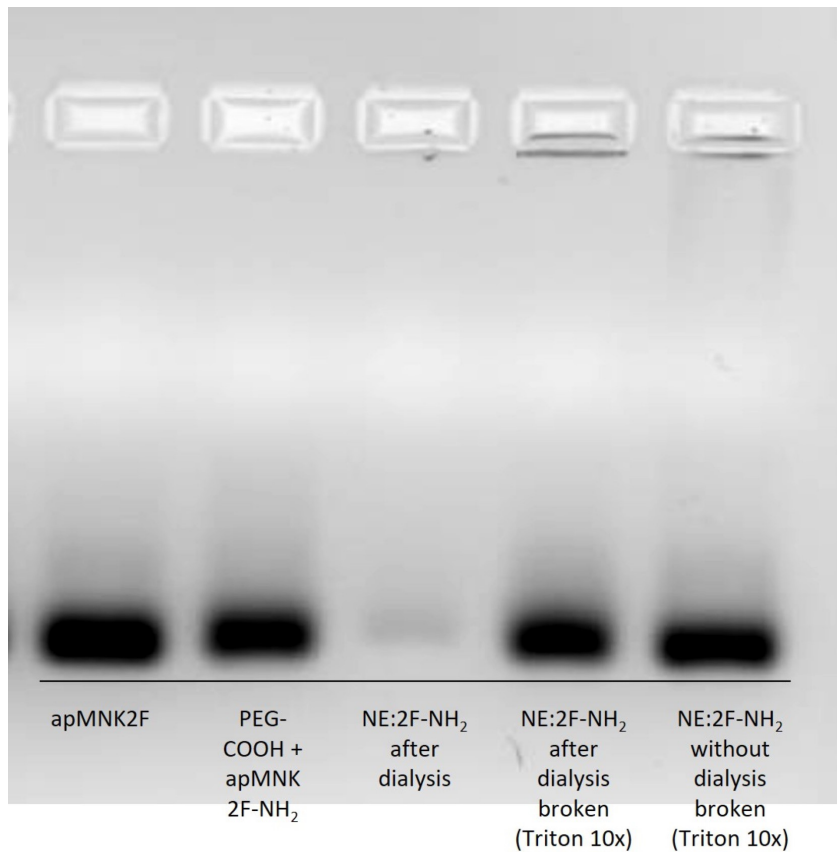

Supplement: d3nr03022a4.pdf [file d3nr03022a4.pdf]

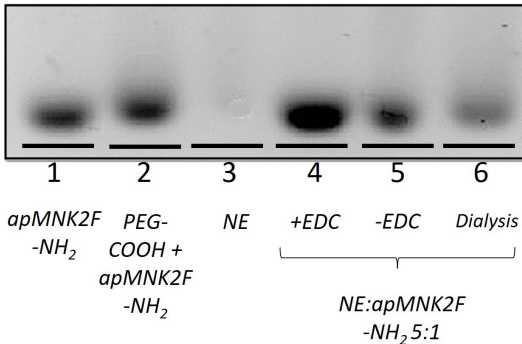

Supplement: d3nr03022a5.pdf [file d3nr03022a5.pdf]

t = 30 minutes

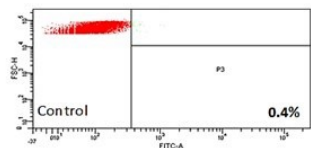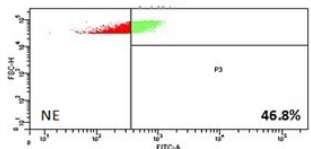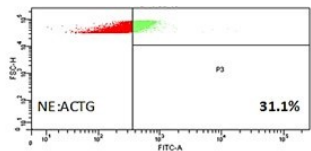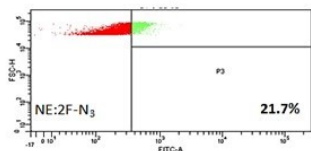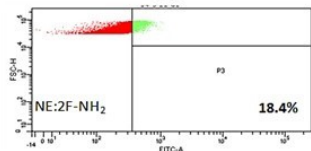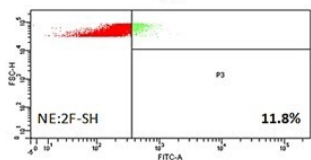

t = 1h

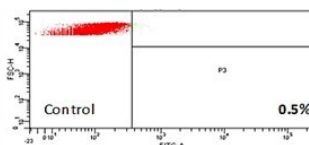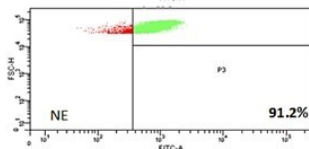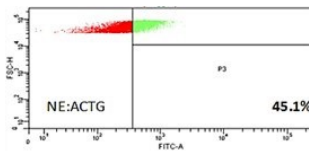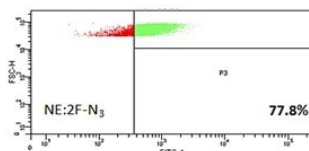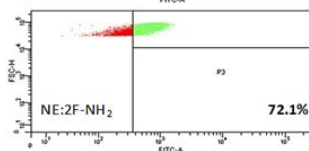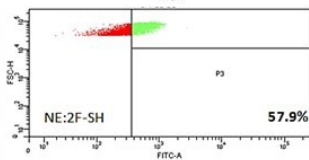

t = 4h

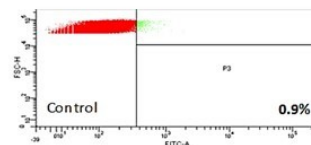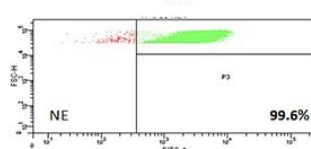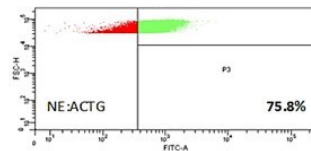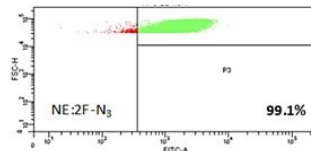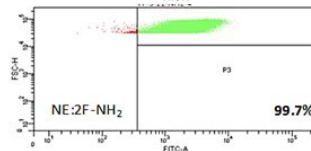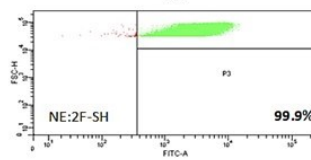

Supplement: d3nr03022a6.pdf [file d3nr03022a6.pdf]

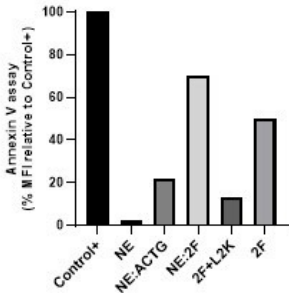

Supplement: d3nr03022a7.pdf [file d3nr03022a7.pdf]

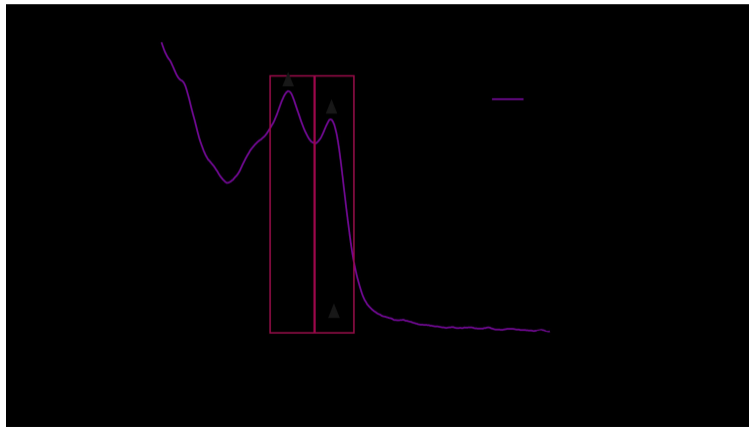

Supplement: d3nr03022a8.pdf [file d3nr03022a8.pdf]

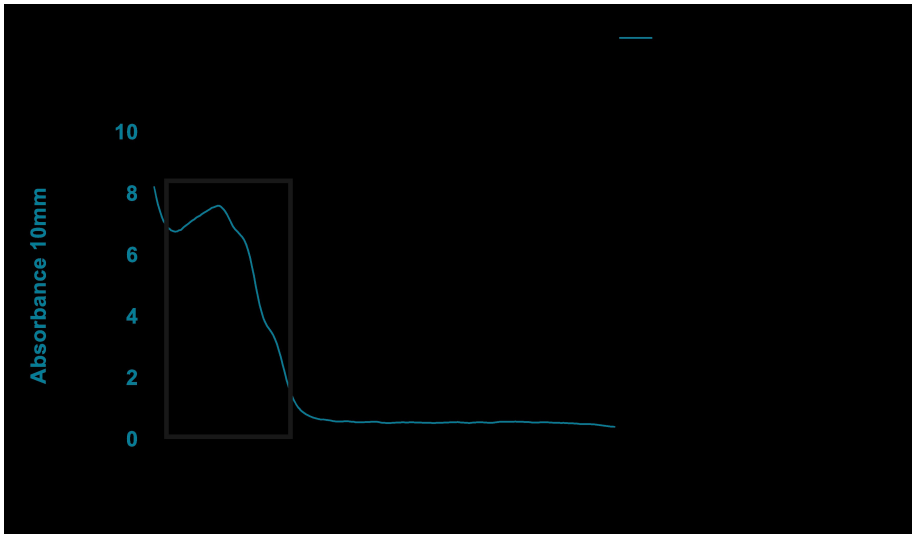

Supplement: d3nr03022a9.pdf [file d3nr03022a9.pdf]
